# Supplementary material
Source: MDPI journal article supplement (https://www.mdpi.com/2072-4292/8/4/339)
Supplement: s1 [file s1]

# Supplementary Material: Estimating Stand Volume and Above-Ground Biomass of Urban Forests Using LiDAR. *Remote Sens.* 2016, 8, 339.

Vincenzo Giannico, Raffaele Laforteza, Ranjeet John, Giovanni Sanesi, Lucia Pesola and Jiquan Chen

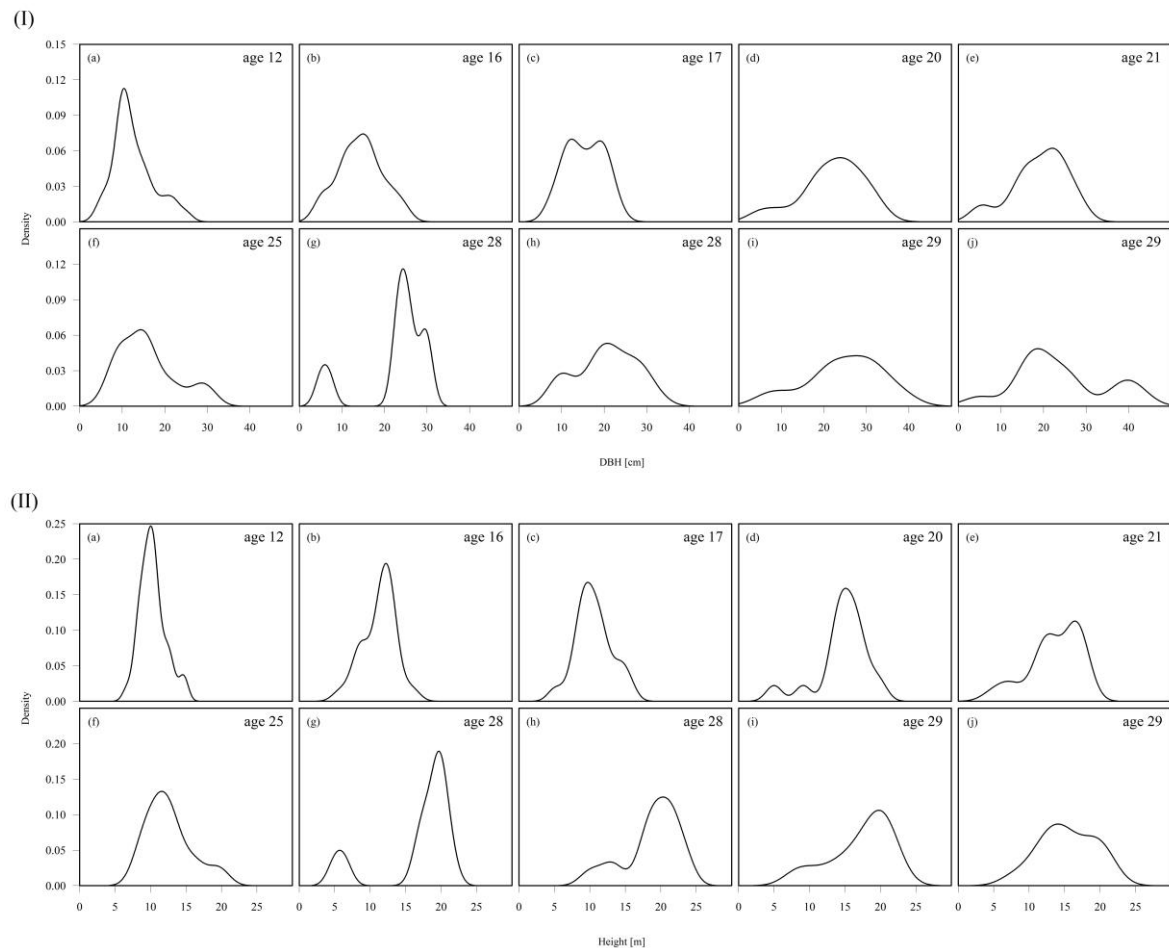

**Figure S1.** Distributions of DBH (I) and H (II) measured in the field for each plot: (a) plot 28C (12 years); (b) 25A (16); (c) 23b (17); (d) 18C (20); (e) 14A (21); (f) 9A (25); (g) 2A (28); (h) 2AND (28); (i) 1A (29); (j) 1D (29).

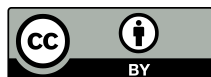

© 2016 by the authors; licensee MDPI, Basel, Switzerland. This article is an open access article distributed under the terms and conditions of the Creative Commons by Attribution (CC-BY) license (<http://creativecommons.org/licenses/by/4.0/>).
